# Supplementary material for: Physiological Mechanisms of Improved Smut Resistance in Sugarcane Through Application of Silicon
Source: PubMed Central journal article supplement (PMC7674639; doi:10.3389/fpls.2020.568130), 2020-11-05
Supplement: Image_1.pdf [file Image_1.pdf]

Supplementary material

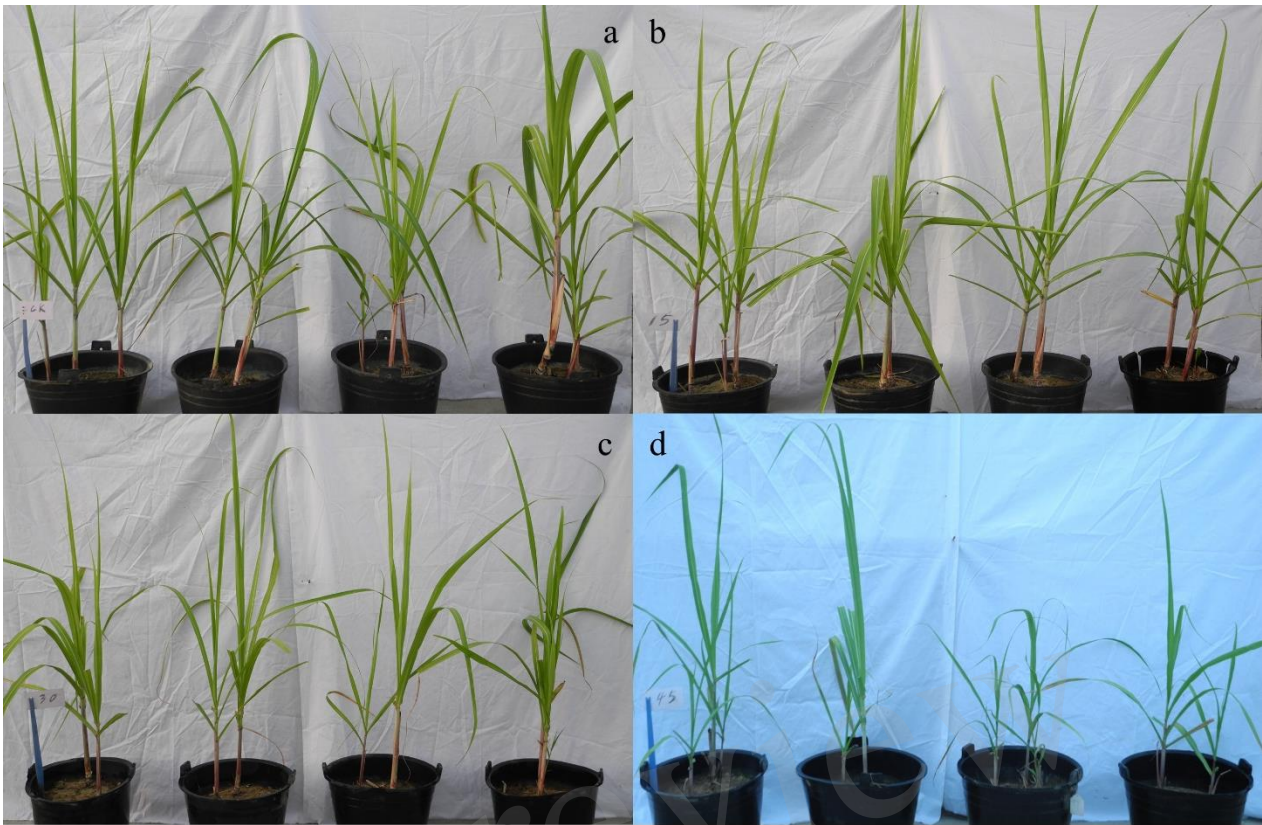

Figure S1 Effect of silicon application on the growth of Badila.

a, CK2, no ESi application; b, Si15, 15g ESi barrel<sup>-1</sup>; c, Si30, 30g ESi barrel<sup>-1</sup>; d, Si45, 45g ESi barrel<sup>-1</sup>
